# Supplementary material
Source: Springer Nature journal article supplement (https://www.springermedizin.de/resource/supplementary/12993_2011_366_MOESM4_ESM.pdf/9617630)
Supplement: MOESM4 [file 9617630]

**A)****Time spent in open sections ZM**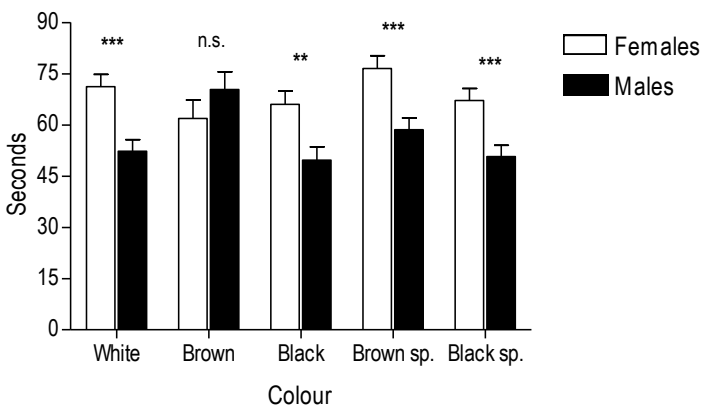

Post hoc Duncan's test ( $p < 0.05$ ) for "Colour": n.s.

**B)****Entries into open sections ZM**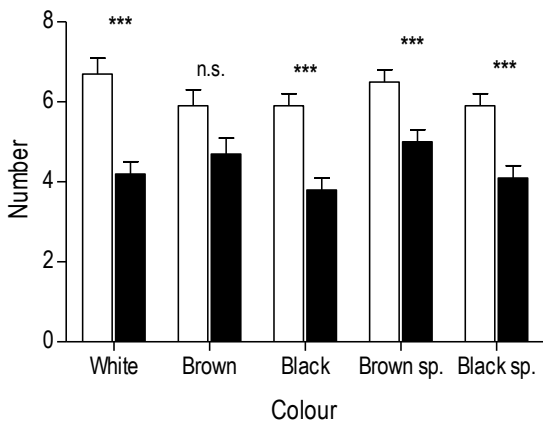

Post hoc Duncan's test ( $p < 0.05$ ) for "Colour":  
 "Brown sp" is different from "Black sp"

**C)****Stretched attend postures in the ZM**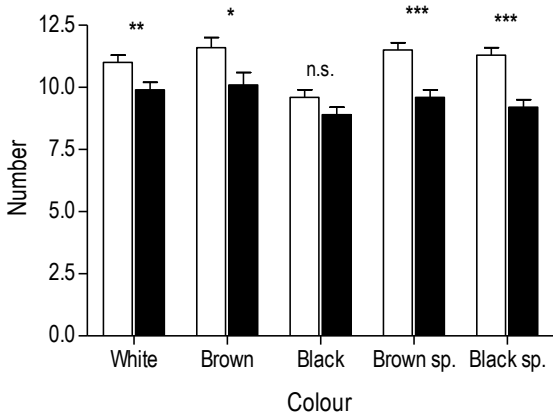

Post hoc Duncan's test ( $p < 0.05$ ) for "Colour":  
 "Black" is different from the other 4 colour groups
